# Supplementary material
Source: publisher figshare collection journal article supplement (https://acs.figshare.com/ndownloader/files/12547640)
Supplement: Supplementary file 1 [file 12547640]

Supporting Information for

**Catalytic Effect of Carbon Dioxide on Reaction  $\text{OH} + \text{CO} \rightarrow \text{H} + \text{CO}_2$  in Supercritical Environment: Master Equation Study**

Artëm E. Masunov,<sup>\*1,2,3,4,5</sup> Elizabeth E. Wait,<sup>1,2</sup> Subith S. Vasu<sup>6</sup>

<sup>1</sup>*NanoScience Technology Center,* <sup>2</sup>*Department of Chemistry,*

<sup>3</sup>*Department of Physics, University of Central Florida, 12424 Research Parkway, Ste 400, Orlando, FL 32826, USA*

<sup>4</sup>*South Ural State University, Lenin pr. 76, Chelyabinsk 454080, Russia*

<sup>5</sup>*National Research Nuclear University MEPhI, Kashirskoye shosse 31, Moscow, 115409, Russia*

<sup>6</sup>*Center for Advanced Turbomachinery and Energy Research (CATER), Mechanical and Aerospace Engineering, University of Central Florida, Orlando, Florida, 32816, USA*

**Table S1:** Intrinsic Reaction Coordinate (IRC) analyses for R1 and R2. Geometries predicted at M11D3 theory level and energies predicted at CBS-QM11 theory level.<sup>1</sup>

| Reverse<br>OH..CO                                                                   | Transition State<br>TS1                                                             | Forward<br>trans-HOCO                                                                 |
|-------------------------------------------------------------------------------------|-------------------------------------------------------------------------------------|---------------------------------------------------------------------------------------|
|    |    |    |
| -1.65 kcal/mol                                                                      | 1.01 kcal/mol                                                                       | -25.71 kcal/mol                                                                       |
| trans-HOCO                                                                          | TS4                                                                                 | cis-HOCO                                                                              |
|    |    |    |
| -25.71 kcal/mol                                                                     | -17.9 kcal/mol                                                                      | -23.71 kcal/mol                                                                       |
| cis-HOCO                                                                            | TS2                                                                                 | H..CO <sub>2</sub>                                                                    |
|   |   |   |
| PRC121                                                                              | TS122                                                                               | IN123                                                                                 |
|  |  |  |
| -1.33 kcal/mol                                                                      | -1.27 kcal/mol                                                                      | -26.78 kcal/mol                                                                       |
| IN123                                                                               | TS124                                                                               | PC125                                                                                 |
|  |  |  |
| -26.78 kcal/mol                                                                     | 0.15 kcal/mol                                                                       | -25.30 kcal/mol                                                                       |

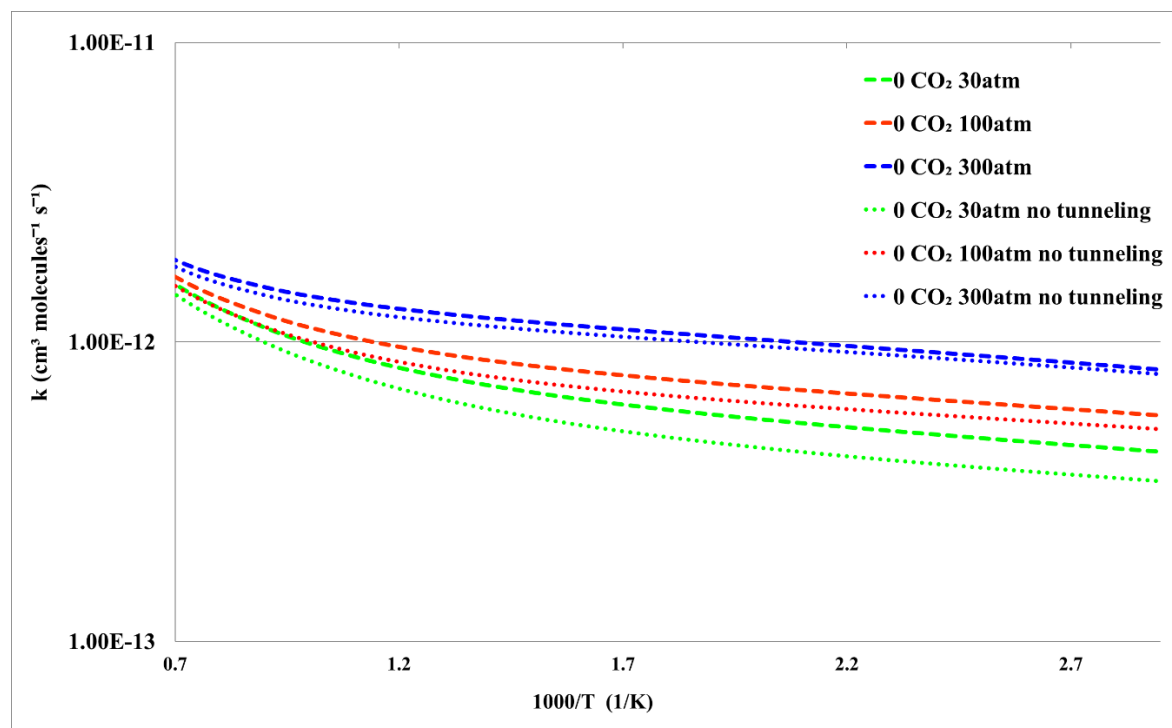

**Figure S1.** Bimolecular rate constants, calculated at 30 atm, 100 atm, and 300 atm for reaction R1 with (dashed) and without (dotted) Eckart tunneling correction. Turning Eckart tunneling correction off for the exit channel slows the rate of the reaction by 22% at room temperature, and 30 atm. This effect decreases as temperature and pressure increase. This is consistent with calculation by Nguyen et al.<sup>2</sup>

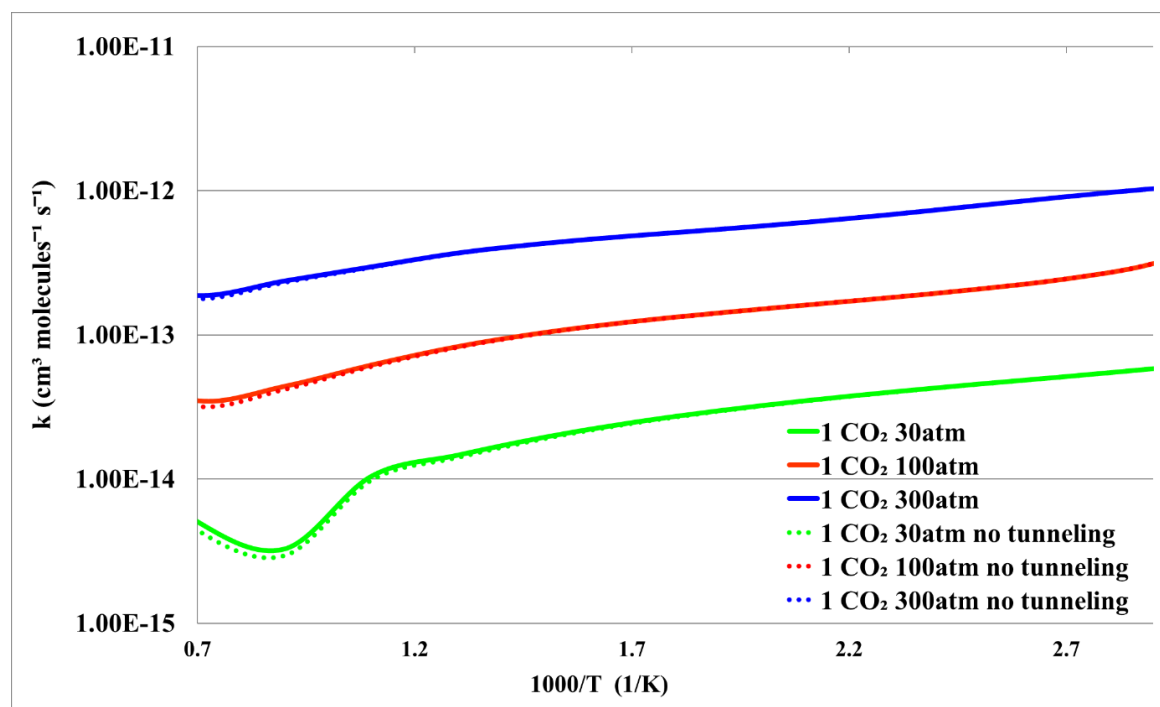

**Figure S2.** Bimolecular rate constants, calculated at 30 atm, 100 atm, and 300 atm for reaction R2 with (solid) and without (dotted) Eckart tunneling correction.

## References

1. Masunov, A. E.; Wait, E.; Vasu, S. S., Chemical Reaction  $\text{CO} + \text{OH} \rightarrow \text{CO}_2 + \text{H}$  Autocatalyzed by Carbon Dioxide: Quantum Chemical Study of the Potential Energy Surfaces. *J. Phys. Chem. A* **2016**, *120*, 6023-6028.
2. Nguyen, T. L.; Xue, B. C.; Weston, R. E. J.; Barker, J. R.; Stanton, J. F., Reaction of HO with CO: Tunneling Is Indeed Important. *J. Phys. Chem. Lett.* **2012**, *3*, 1549-1553.
